# Supplementary material for: Biogeochemical Dynamics of the Sea-Surface Microlayer in a Multidisciplinary Mesocosm Study
Source: Copernicus journal article supplement (doi:10.5194/egusphere-2025-1773), 2025-05-05
Supplement: Supplementary file [file egusphere-2025-1773-AC2-supplement.pdf]

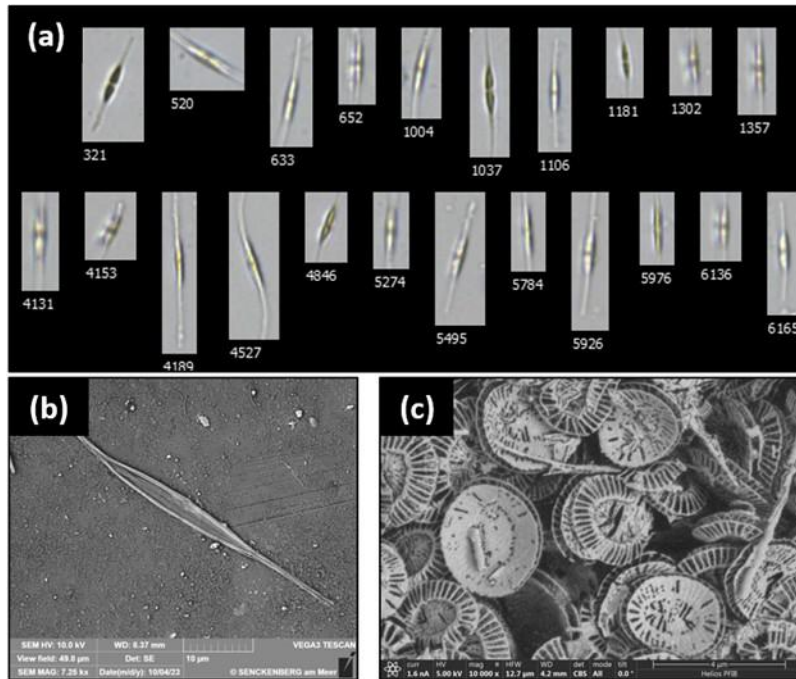

**Figure R1.** Bloom-forming species observed during the mesocosm experiment. (a) FlowCam images of *Cylindrotheca closterium* (numbers indicate image identifiers). (b) SEM image of *C. closterium*. (c) SEM image of coccoliths belonging to *Emiliana huxleyi*.
